# Supplementary material
Source: PubMed Central journal article supplement (PMC8867384)
Supplement: NIHMS1581989-supplement-Supplementary_Material.pdf [file NIHMS1581989-supplement-Supplementary_Material.pdf]

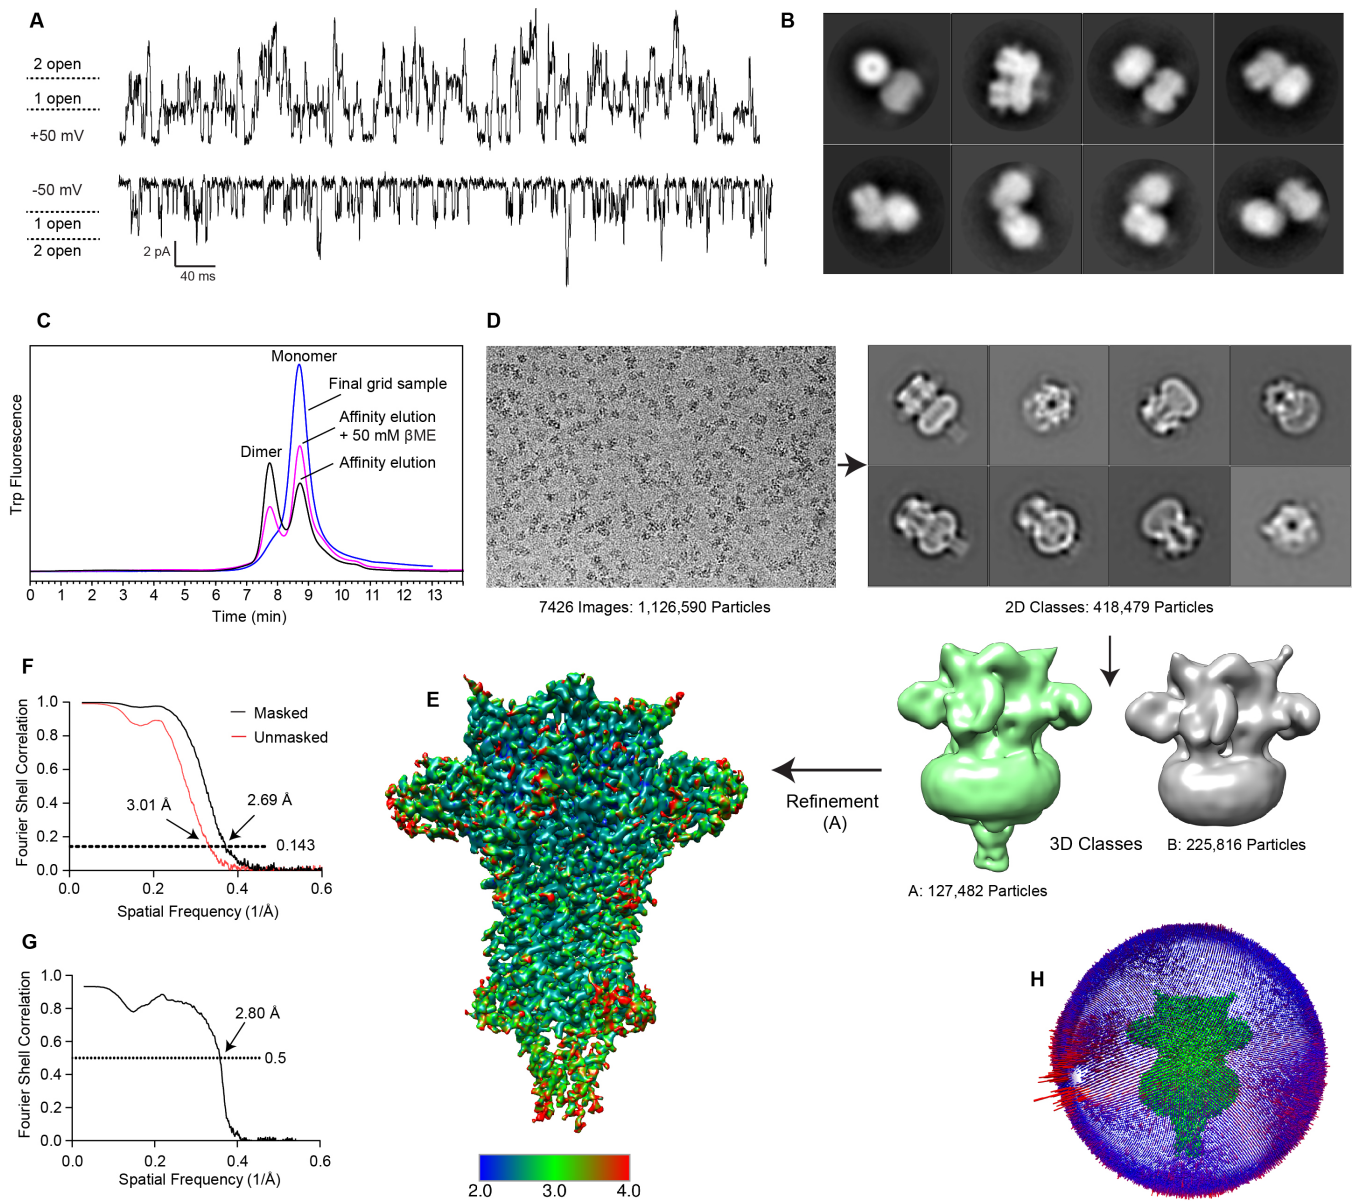

**Figure S1. Biochemistry, Cryo-EM image processing and map-model parameters**

*Related to Figure 1 and STAR Methods*

(A) Single channel recordings from excised patches from *Torpedo* receptor reconstituted into soy lipid liposomes. Dashed lines indicate approximate current levels for 1 and 2 channels open. Single channel current amplitudes are non-rectifying in the range of +50 to -50 mV with a mean single channel amplitude of 2.3 pA, equivalent to  $\gamma = 46$  pS. (B) 2D classification from a small cryo-EM dataset in which dimeric receptors were not treated with reducing reagent reveals heterogeneity in relative orientations between receptors. (C) Analytical size-exclusion chromatography of preparation used to generate high resolution reconstruction at different steps. (D) Relion workflow. (E) Local resolution map. Angular distribution histogram. (F) FSC curve. (G) Map-model FSC. (H) Angular distribution histogram.

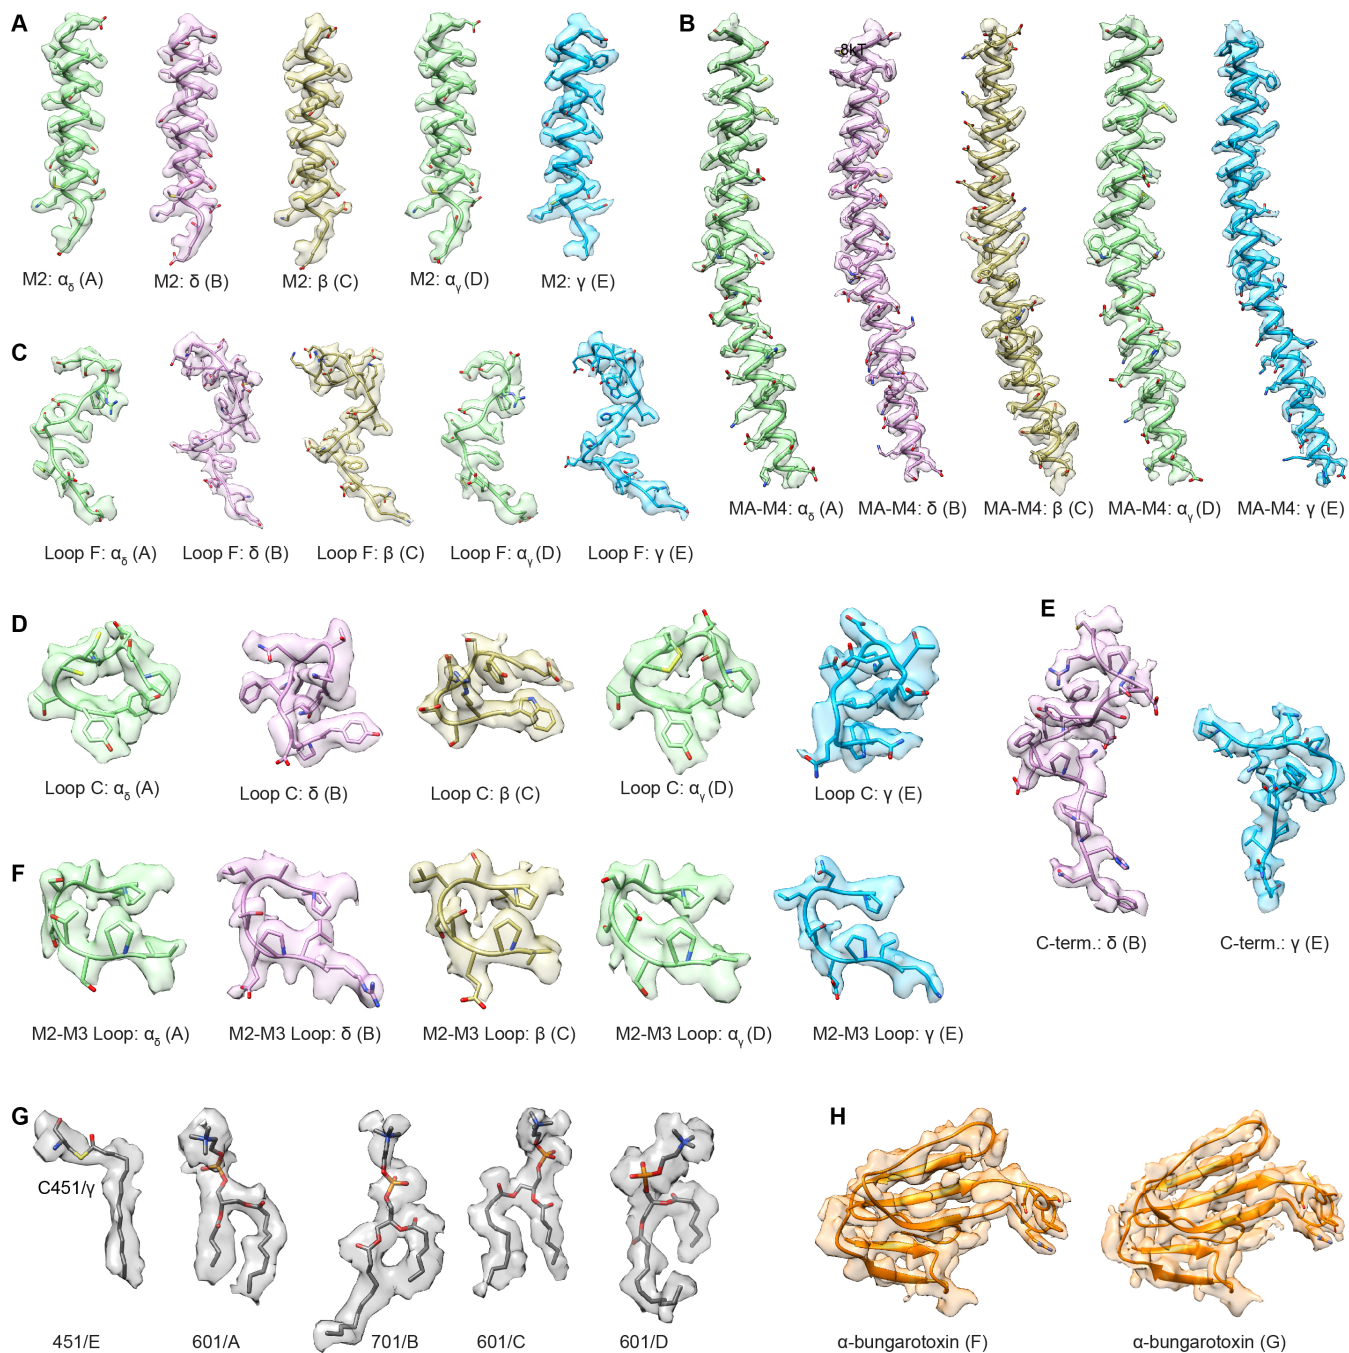

## Figure S2. Representative map quality

*Related to Figure 1*

(A) M2  $\alpha$ -helices. (B) MA-M4  $\alpha$ -helices. (C) Loop F. (D) Loop C. (E) Extended C-termini of  $\delta$  and  $\gamma$  subunits. (F) M2-M3 loop. (G) Presumptive palmitoylation at C451/ $\gamma$  and bound PC lipids. (H)  $\alpha$ -bungarotoxins. Density map of protein region was contoured at a threshold of 0.006 and for lipid 0.003 in UCSF Chimera.

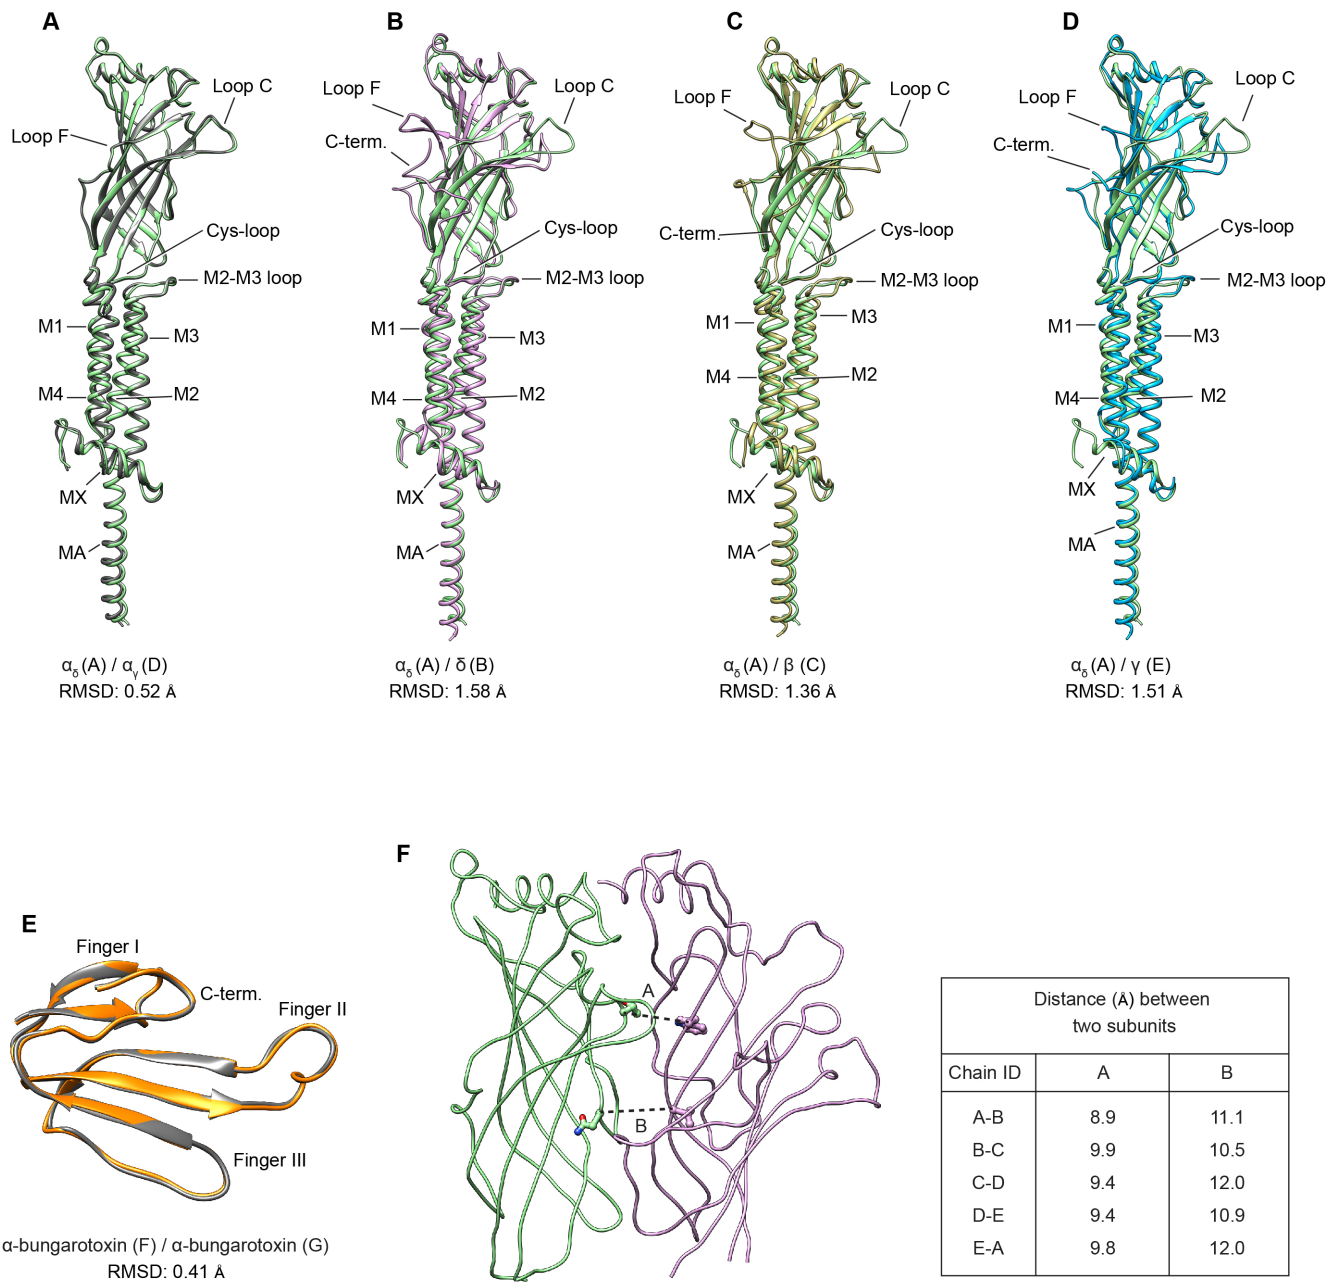

### Figure S3. Comparison between subunits

*Related to Figure 1*

(A-D) Pairwise superposition of all five subunits;  $\alpha_6$  (chain A, green),  $\alpha_\gamma$  (chain D, gray),  $\beta$  (chain C, yellow),  $\gamma$  (chain E, blue) and  $\delta$  (chain B, violet) and their corresponding RMSDs are written underneath. (E) Superposition of the two  $\alpha$ -bungarotoxins bound to two different interfaces;  $\alpha_6/\delta$  (chain F) and  $\alpha_\gamma/\gamma$  (chain G). (F) Assessments of ECD asymmetry by measuring distances between corresponding C $\alpha$  positions. Noteworthy is that while loop C is propped open by the toxin, this local asymmetry does not propagate to a more globally asymmetric ECD.



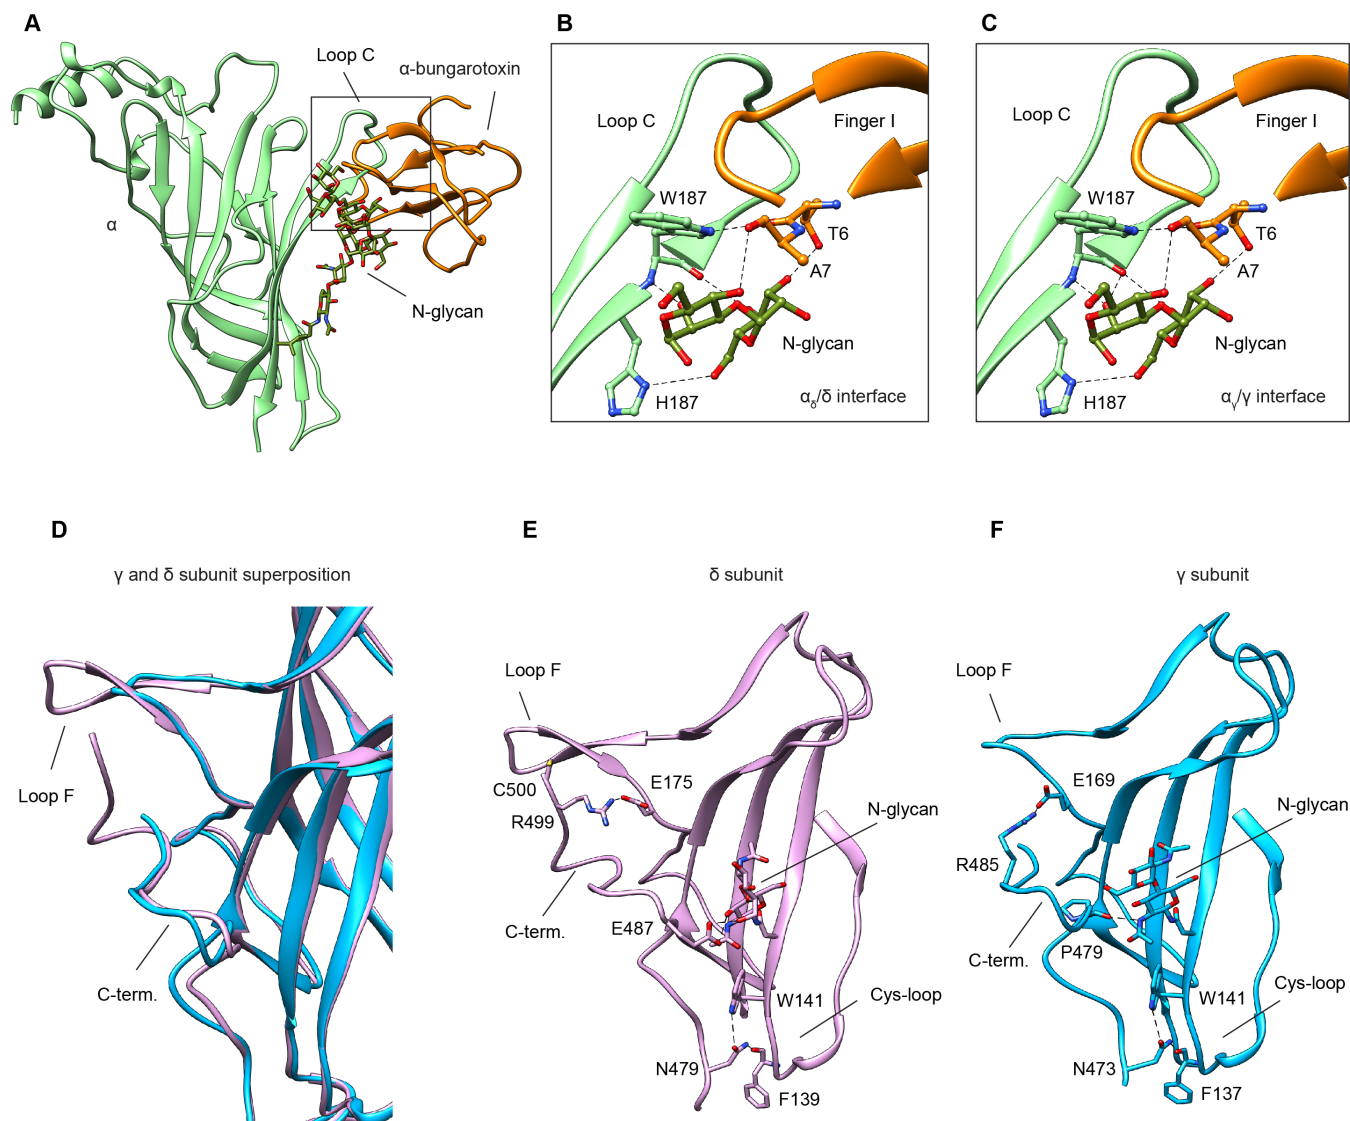

**Figure S4. Glycosylation site at primary binding site and extended loop F and C-terminus from complementary binding site**

*Related to Figure 1 and Figure 2*

(A) Glycosylation site between  $\alpha$ -subunit and toxin. (B, C) Interaction between N-glycan, loop C of receptor and toxin at  $\alpha_5$  and  $\alpha_\gamma$  subunit interfaces respectively. (D) Superposition of  $\gamma$  and  $\delta$  subunit showing the difference in their loop F and C-terminus. (E, F) Interaction of C-terminus with Cys-loop and loop F at  $\delta$  and  $\gamma$  subunit respectively. Interacting residues are shown as stick model. Residue C500 in the  $\delta$  subunit makes the disulfide bond between two monomers of nicotinic receptor in native *Torpedo* membrane.



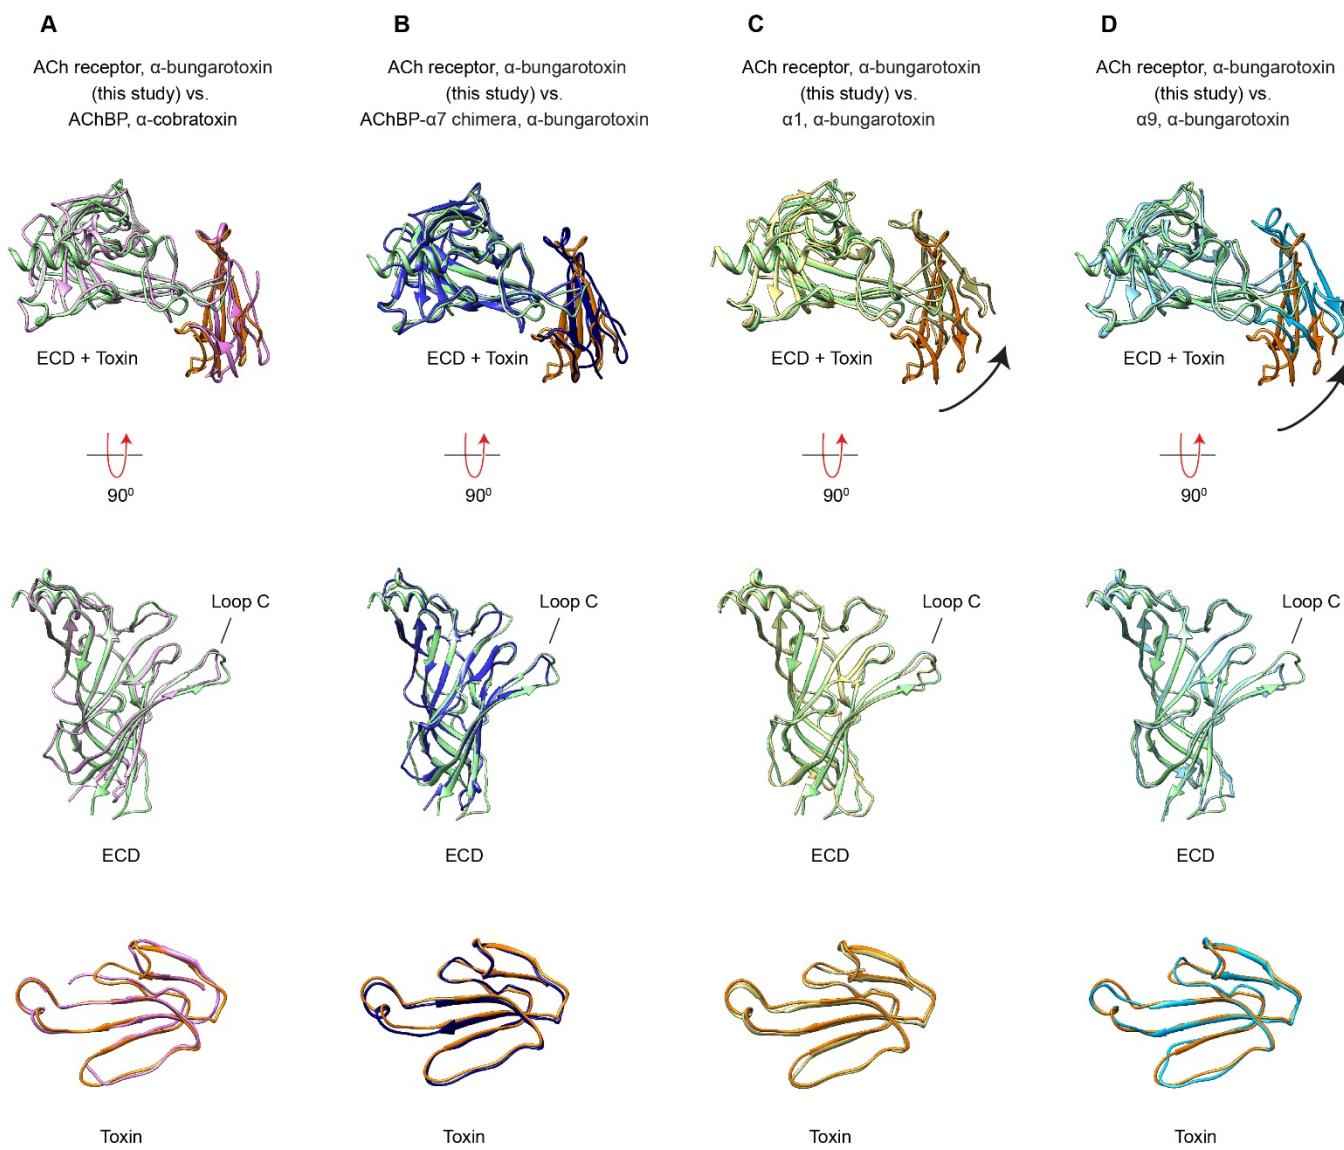

**Figure S5. Comparison of the ECD and toxin conformations**

*Related to Figure 1 and Figure 2*

Comparison of *Torpedo* receptor –  $\alpha$ -bungarotoxin complex (receptor - green, toxin - orange) with (A) AChBP complex with  $\alpha$ -cobratoxin (PDB ID: 1YI5; violet); (B) AChBP- $\alpha$ 7 chimera with  $\alpha$ -bungarotoxin (PDB ID: 4HQP; blue); (C)  $\alpha$ 1-ECD complex with  $\alpha$ -bungarotoxin (PDB ID: 2QC1; yellow). (D)  $\alpha$ 9-ECD complex with  $\alpha$ -bungarotoxin (PDB ID: 4UY2; cyan).

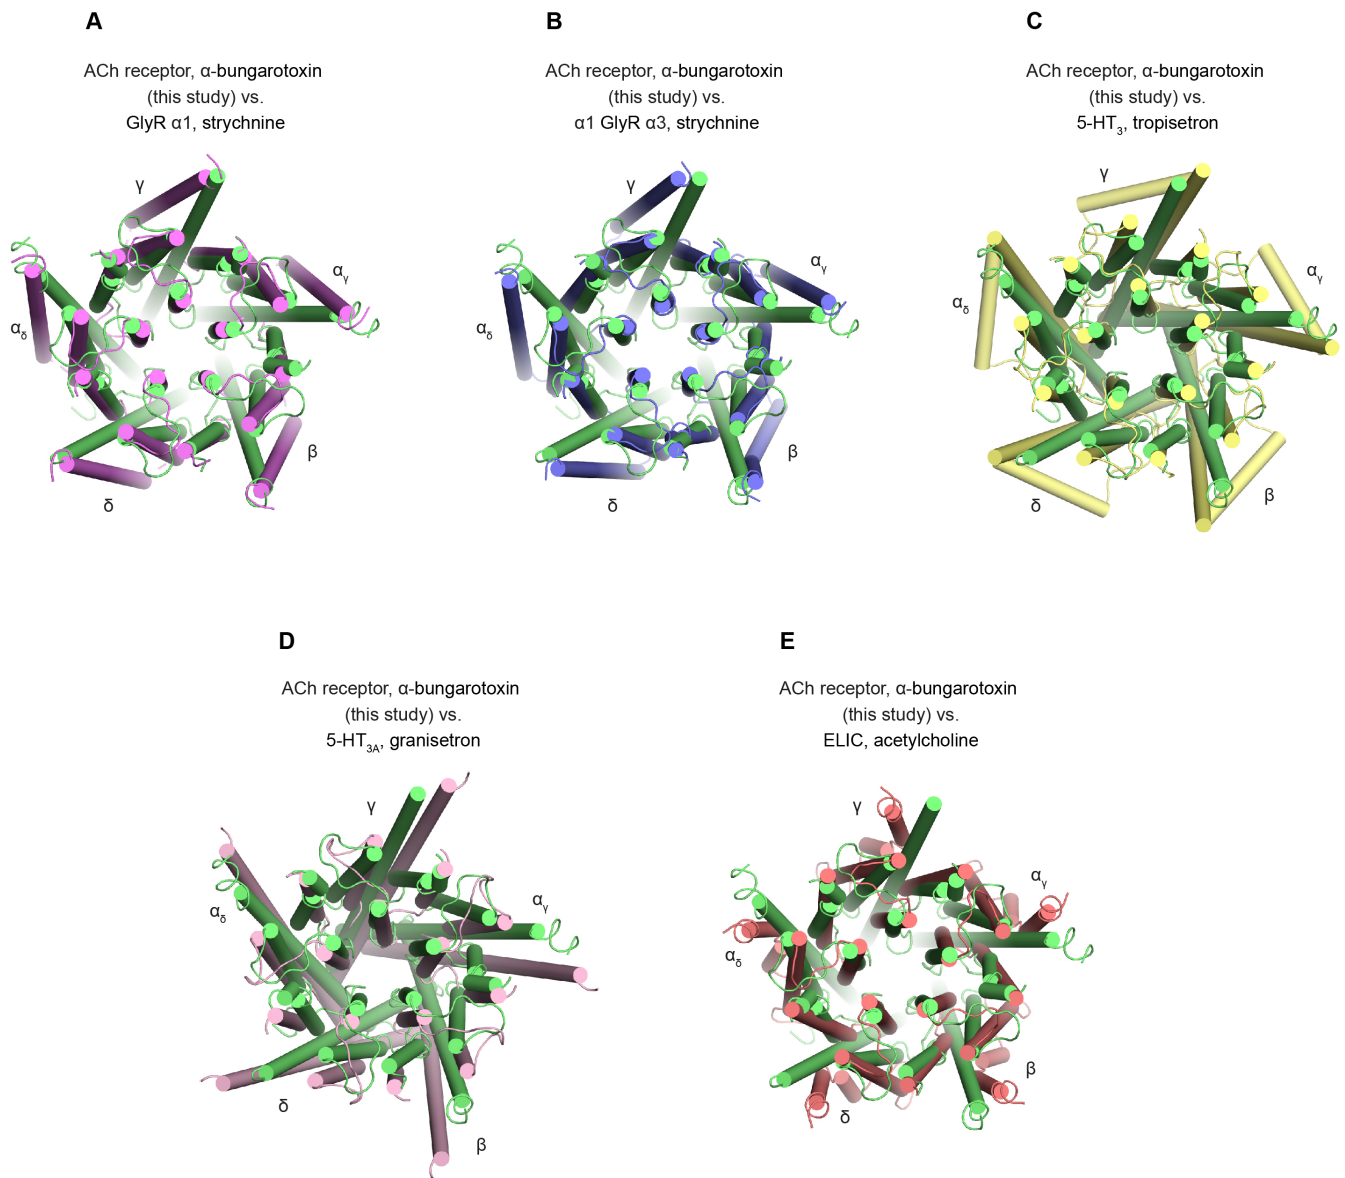

**Figure S6. Comparison of the transmembrane domain conformations**

*Related to Figure 3*

Superposition of toxin-bound *Torpedo* receptor TMD (green) with antagonist-bound Cys-loop receptor structures: (A) GlyR  $\alpha 1$ , strychnine (PDB ID: 3JAD, violet); (B) GlyR  $\alpha 3$ , strychnine (PDB ID: 5CFB, blue); (C) 5-HT<sub>3</sub>, tropisetron (PDB ID: 6HIS, yellow); (D) 5-HT<sub>3A</sub>, granisetron (PDB ID: 6NP0, pink); (E) ELIC, acetylcholine (PDB ID: 3RQW, red).

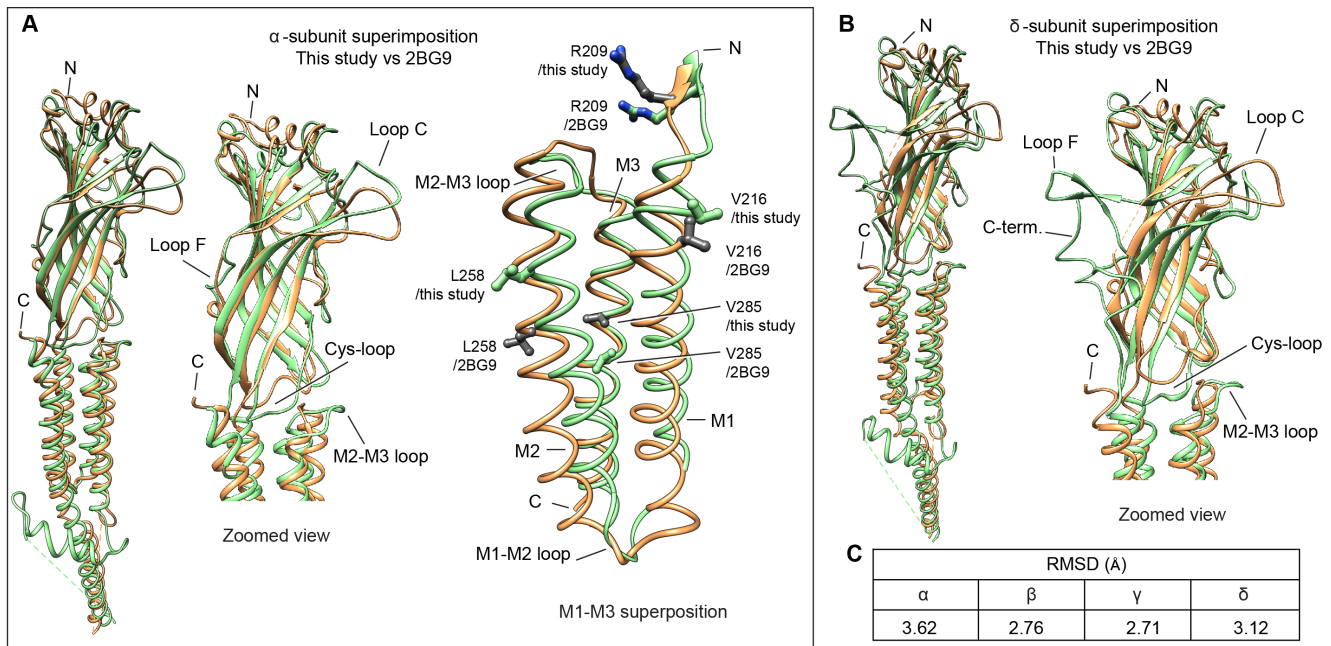

*Torpedo* ACh receptor  
resting state (this study) vs Resting, 2005 (2BG9)

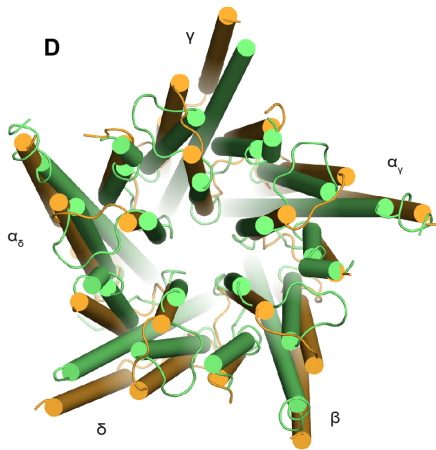

**E**

| Interface area (Å <sup>2</sup> ) |            |      |
|----------------------------------|------------|------|
| Subunits                         | This study | 2BG9 |
| $\alpha_5 - \delta$              | 3177       | 1304 |
| $\delta - \beta$                 | 3282       | 1850 |
| $\beta - \alpha_v$               | 3201       | 1413 |
| $\alpha_v - \gamma$              | 3045       | 1661 |
| $\gamma - \alpha_5$              | 3202       | 1699 |

| Interface area (Å <sup>2</sup> )<br>at ligand-binding subunits |      |
|----------------------------------------------------------------|------|
| GlyR $\alpha_1$ , strychnine - 3JAD                            | 2130 |
| GlyR $\alpha_3$ , strychnine - 5CFB                            | 2243 |
| 5-HT <sub>3</sub> , Tropisetron - 6HIS                         | 3172 |
| 5-HT <sub>3</sub> , granisetron - 6NP0                         | 3034 |
| 5-HT <sub>3</sub> , apo - 6BE1                                 | 3190 |
| GABA <sub>A</sub> , bicuculline - 6HUK                         | 3033 |

*Torpedo* ACh receptor  
resting state (this study) vs Open, 2012 (4AQ9)

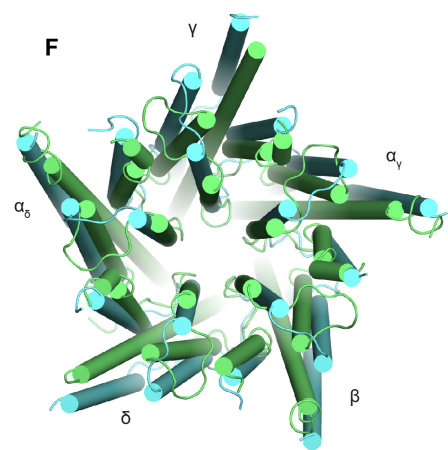

## Figure S7. Comparison with earlier structures of the *Torpedo* nicotinic receptor

Related to Figure 1 and Figure 3

(A) Superposition of  $\alpha$  subunits from our structure (green) and the *Torpedo* resting state structure (PDB ID: 2BG9, orange). The ECD in the earlier models was derived from crystal structures of the acetylcholine binding protein and agrees well with our model. Notable differences include the N-terminal  $\alpha_1$  helix, which is roughly planar to the membrane in our model and other eukaryotic superfamily structures; loop C, which in  $\alpha$  subunits likely relates to toxin binding in our model absent from the 2BG9 condition, but is modeled differently in other subunit as well (c.f. panel B); and the Cys-loop, which buckles up toward the ECD core in the 2BG9 and 4AQ9 models, while in our toxin-bound model the Cys-loop rests in the ECD surface of the TMD in a manner similar to other recent superfamily structures. Throughout much of the TMD we confirm a register error in the 2BG9 and 4AQ9 models



(right side of panel A, with the same residues from both structures shown as sticks, 2BG9 sticks in grey). The M1-M2 and M2-M3 loops adopt divergent conformations, which is likely the source of the TMD register discrepancy. (B) Superposition of  $\delta$  subunits between our structure and 2BG9. Several elements we observe were not modeled in 2BG9 or 4AQ9: loop F insertions, long C-termini, MX-helices from all subunits. (C) RMSD of  $\alpha$ -carbons between corresponding subunits of the toxin-bound structure and 2BG9. (D) Comparison of the TMD conformations between our structure and 2BG9. (E) Interface area between subunits for the toxin-bound *Torpedo* receptor structure and 2BG9 (upper table) and, for comparison, the surface area buried at antagonist-bound and apo (for 5-HT<sub>3A</sub>) interfaces of other Cys-loop receptors (lower table). Glycine and GABA<sub>A</sub> receptors lack an ordered ICD that would contribute to the larger surface area buried in 5-HT<sub>3A</sub> and *Torpedo*. As such, the GABA<sub>A</sub> receptor + bicuculline has remarkably extensive interfaces while the earlier *Torpedo* receptor model is very loosely packed. The relatively weak interface contacts in the earlier *Torpedo* model led us to make the model-map comparisons shown in Figure S8, where we observed that the maps used for building the earlier models likely used an incorrect magnification factor during data processing. The increased pixel size would result in an artifactually larger map and would explain why the molecular interfaces are so loose and the pores are so large in earlier models 2BG9, 4AQ5 and 4AQ9. Surface area analysis was generated by PDBePISA. (F) Comparison of the TMD conformations between our structure and *Torpedo* open state structure (PDB ID: 4AQ9, cyan).

**A** Torpedo ACh receptor (this study)  
docked into EMD-2071 map

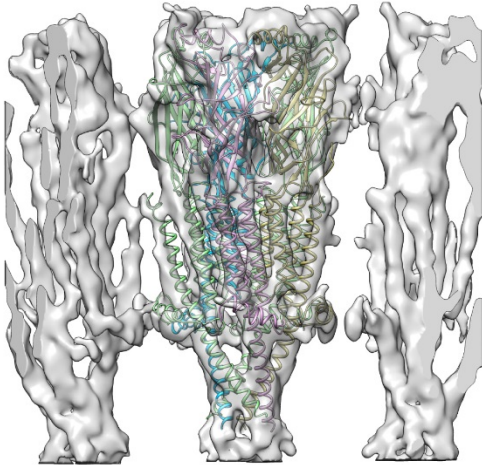

**B** Torpedo ACh receptor (this study)  
docked into EMD-2071 map (rescaled to 90%)

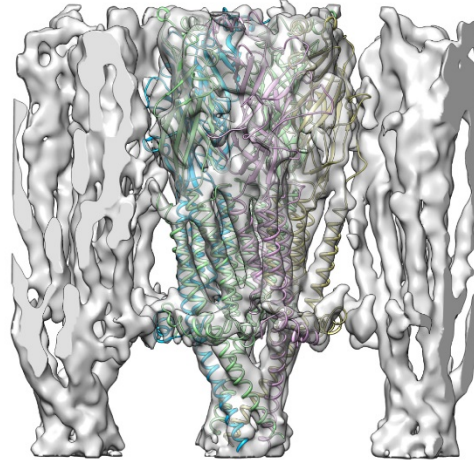

**C** Corrected subunit register of EMD-2071 map (rescaled)  
Model: this study

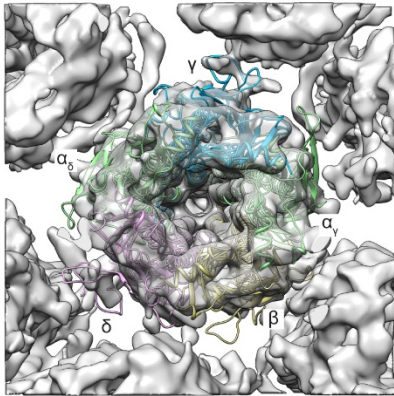

**D** Original subunit register of EMD-2071 map  
Model: PDB ID 4AQ5

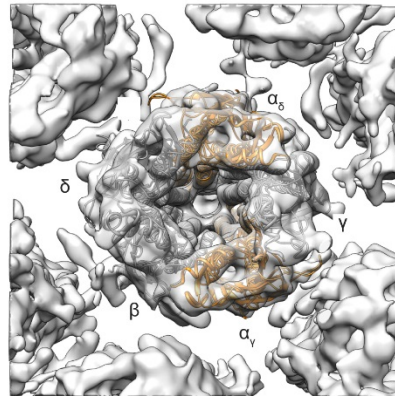

**E** Corrected subunit register EMD-2071  
Model: this study

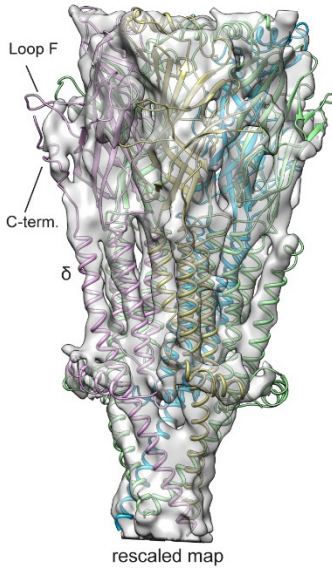

**F** Original subunit register EMD-2071  
Model: PDB ID 4AQ5

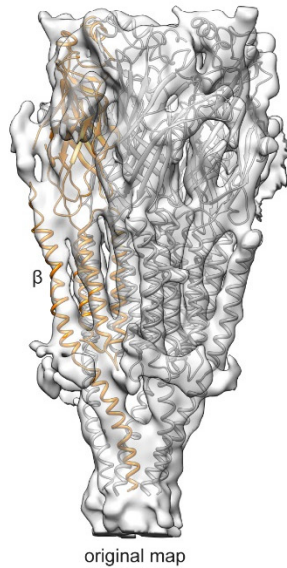

**G** Corrected subunit register EMD-2071  
Model: this study

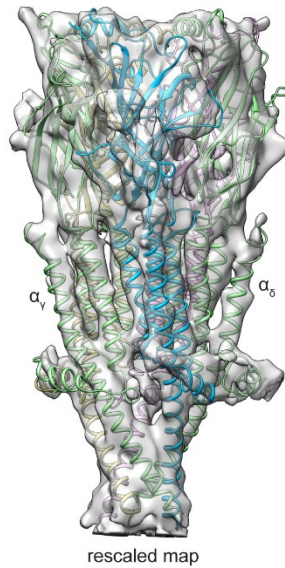

**H** Original subunit register EMD-2071  
Model: PDB ID 4AQ5

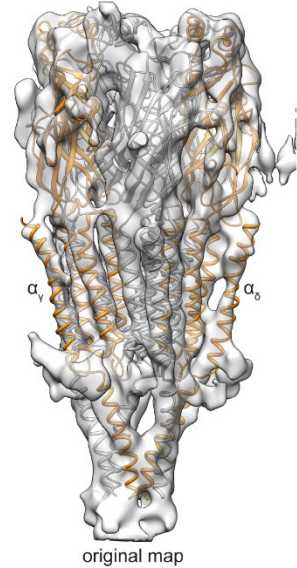

**Figure S8. Putative magnification and subunit register errors in earlier structures of the *Torpedo* ACh receptor**

*Related to Figure 1*

(A) The model from this study (with toxin removed) docked into the earlier closed-state *Torpedo* map (EMD-2071, related to 4AQ5 resting-state model) illustrates the expanded nature of the earlier *Torpedo* maps. (B) We found that rescaling this earlier *Torpedo* map to 90% of its original size resulted in a good fit of the model from the current study. Docking of the current study's model into the EMD-2071 map suggested that in addition to the pixel size discrepancy, the subunit register assigned for the 2BG9, 4AQ5 and 4AQ9 models may also be incorrect. We make this suggestion based on large density blobs in the EMD-2017 map, in the ECD, that align well with the large C-terminal extension and large F-loop insertions present in the  $\delta$  and  $\gamma$  subunits but absent in the  $\alpha$  subunit sequence. (C) What we suggest is the correct subunit register of the model from this study docked into the rescaled EMD-2017 map. (D) PDB 4AQ5 model in its original position in the EMD-2017 map, where the largest blobs of density are assigned to the  $\alpha$  and  $\beta$  subunits, in what we suggest is the incorrect subunit register relative to the map. (E) Model and map as in panel C, illustrating fit of C-terminal and loop F substructures in the EMD-2017 map with what we suggest is the correct register. In the earlier model and map, shown in panel (F) what we suggest should be the  $\delta$  subunit was assigned as the  $\beta$  subunit. Panels (G, H) provide rotated views of the same model-map combinations shown in E and F, wherein what we suggest is the correct subunit register in the map leaves no density extending from the C-termini of the  $\alpha$  subunits or at the position of the F loops in the ECD.



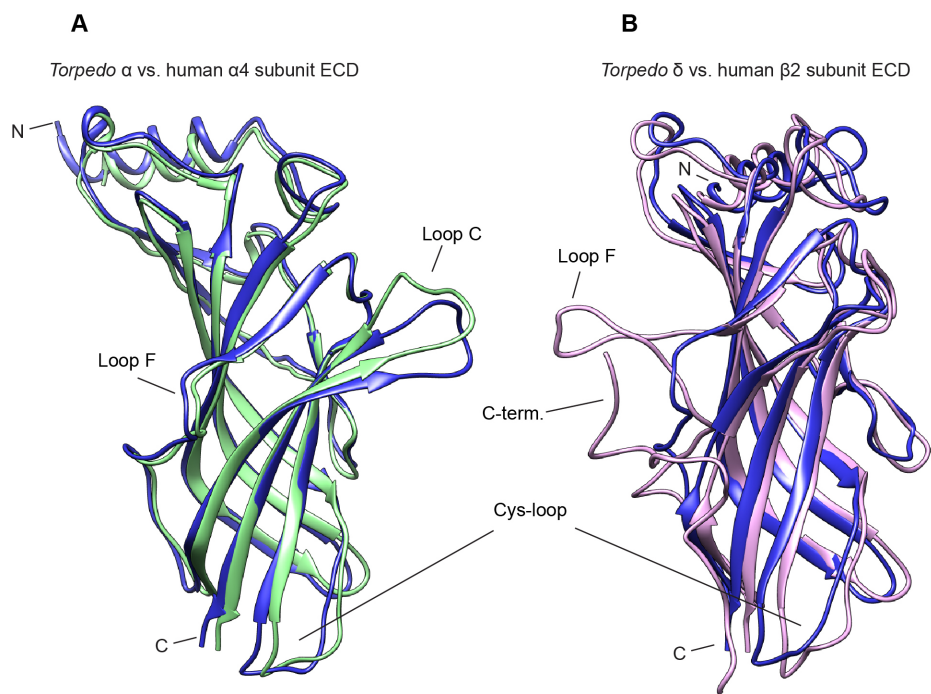

**Figure S9. Comparison of the *Torpedo* ECD conformation with human nicotinic receptor,  $\alpha 4\beta 2$  (PDB ID: 6CNJ)**

*Related to Figure 1*

(A) Superposition of *Torpedo*  $\alpha$  (green) and human  $\alpha 4$  (blue) subunits. (B) Superposition of *Torpedo*  $\delta$  (violet) and human  $\beta 2$  (blue) subunits.





alpha\_Torpedo SEHETRLVANLLE--NYNKVIRPVEHHTHFVDITVGLQLIQLISVDEVNQIVETNVRLRQ 58  
 alpha1\_Human SEHETRLVAKLFK--DYSSVVRPVEDHRQVVEVTVGLQLIQLINVDEVNQIVTTNVRLKQ 58  
 alpha3\_Human SEAEHRLFERLFE--DYNEIIRPVANVSDPVI IHFEVMSQLVKVDEVNQIMETNLWLKQ 58  
 alpha4\_Human AHAEERLLKKLFS--GYNKWSRPVANI SDVVLVRFGLSIAQLIDVDEKNQMMTTNVVVKQ 58  
 alpha7\_Human GEFQRKLYKELVK--NYNPLERPVANSDQPLTVYFSLSLQLIMDVDEKNQVLTNTNIWLQM 58  
 alpha9\_Human GKYAQKLFNDLFE--DYSNALRPVEDTDKVLNVTLQITLSQIKMDERNQILTAYLWIRQ 58  
 beta\_Torpedo SVMEDTLLSVLFE--TYNPKVRPAQTVGDKVTVRVGLTLTNLLILNEKIEEMTTNVFLNL 58  
 beta1\_Human SEAEGRRLRGKLF--GYDSSVRPAREVGDVRVSVGLILAQQLISLNEKDEEMSTKVYLDL 58  
 gamma\_Torpedo ENEEGRLIEKLLG--DYDKRIIPAKTLDHIIDVTLKLTNTNLSLNEKKEEALTTNVWIEI 58  
 gamma\_Human RNQEERLLADLMQ--NYDPNLRPAERDSVVMVSLKLTNTNLSLNEREEALTTNVWIEIEM 58  
 epsilon\_Human KNEELRLYHHLFN--NYDPGSRPVREPEDTVTISLKVTLTNLISLNEKEETLTTSVWVIGI 58  
 delta\_Torpedo VNEEERLINDLLIVNKYKHVRPVKHNNEVVNIALSLTSLNLSLKETDETLTNSVWMDH 60  
 delta\_Human LNEEERLIRHLFQEKGYKELRPAVHAKESVDVALALTLNLSLKEVEETLTNTNVWIEH 60



alpha\_Torpedo QWIDVRLRWNPADYGGIKKIRLPSDDVWLPDLVLYNNADGDFAI VHMTKLLLDYTGKIMW 118  
 alpha1\_Human QWVDYNLKWNPDDYGGVKKIHIPSEKIWRPDLVLYNNADGDFAI VKFTKVLQYTGHTW 118  
 alpha3\_Human IWNDYKLLKWNPSDYGGAEFMRVPAQKIWKPDIVLYNNAVGDFQVDDKTALKKYTGCVTW 118  
 alpha4\_Human EWHDYKLRWDPADYENVTSIRIPSELWIWRPDIIVLYNNADGDFAVTHLTKAHLFHDGQVSW 118  
 alpha7\_Human SWTDHYLQWNVSEYPGVKTVRFPDQIWKPDILLYNSADERFDATFHTNVLVNSSGHCCQY 118  
 alpha9\_Human IWHDAYLTWDRDQYDGLDSIRIPSDLVWRPDIIVLYNKADDESSEPVNTNVVLRDGLITW 118  
 beta\_Torpedo AWTDYRLQWDPAAAYEGIKDLRIPSSDVWQPDIVLMNNNDGSFEITLHVNVLVQHTGAVSW 118  
 beta1\_Human EWTDYRLSWDPAEHDGIDSLRITAESVWLPDVVLLNNNDGNFYVALDISVVVSSDGSVRW 118  
 gamma\_Torpedo QWNDYRLSWNTSEYEGIDLVRIPSELLWLPDVVLENNVDGQFEVAYANVLYVNDGSMYW 118  
 gamma\_Human QWCDYRLRWRDPRDYEGLVWLRVPSMTVWRPDIIVLENNVDGVFEVALYCNVLSVDPGCIYW 118  
 epsilon\_Human DWQDYRLNYSKDDFGGIETLRVPSELVWLPDIIVLENNIDGQFGVAYDANVLYVEGGSVTW 118  
 delta\_Torpedo AWYDHRLTWNASEYSDISILRLLPELVWIPDIIVLQNNNDGQYHVAYFCNVLVRPNGYVTW 120  
 delta\_Human GWTDRNLKWNAAEFNGNISVLRLLPDMVWLPDIIVLENNNDGSFQISYSCNVLYHYGFVYW 120



alpha\_Torpedo TPPAIFKSYCEIIVTHFPFDQNCNTMKLGIWITYDGTKVSISPESDR-----PD 166  
 alpha1\_Human TPPAIFKSYCEIIVTHFPFDEQNCNCKMLGWTYDGSVVAINPESDQ-----PD 166  
 alpha3\_Human IPPAIFKSSCKIDVTYFPFDYQNCNTMKFGSWSYDKAKIDLVLIGSS-----MN 166  
 alpha4\_Human TPPAIYKSSCSIDVTFPFQDQNCNTMKFGSWTYDKAKIDLVMHRSR-----VD 166  
 alpha7\_Human LPPGIFKSSCYIDVRWFPFDVQVHCKLFGSWSYGGWSLDLQ-----QE-----AD 164  
 alpha9\_Human DAPAITKSSCVVDVTYFPFDNQCNLTFGSWTYNGNQVDIFINALDS-----GD 166  
 beta\_Torpedo QPSAIYRSSCTIKVMYFPFDWQNCNTMVFKSYTYDTSEVTLQHALDAKGER--EVKEIVIN 176  
 beta1\_Human QPPGIYRSSCSIQVTYFPFDWQNCNTMVFSSYSYDSSEVSLQTLGLGPDGQG---HQEIIH 175  
 gamma\_Torpedo LPPAIYRSTCPIAVTYFPFDWQNCNLSVFRSQTYNAAHEVNLQLSA----EEGEAVEWIHID 174  
 gamma\_Human LPPAIFRSACISVTYFPFDWQNCNLSIFQSQTYSTNEIDLQLSQ---EDGQTIEWIFID 174  
 epsilon\_Human LPPAIYRSVCAVEVTYFPFDWQNCNLSIFRSQTYNAAEEVEFTFAVD---NDGKTINKIDID 175  
 delta\_Torpedo LPPAIFRSSCPINVLYFPFDWQNCNLSLFTALNYDANEITMDLMTDTIDGKDYPIEWI IID 180  
 delta\_Human LPPAIFRSSCPISVTYFPFDWQNCNLSLKFSSLYKTAKEITLSLKQDAKENRTPVEWIIID 180

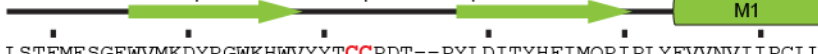

alpha\_Torpedo LSTFMESGEWVMKDYRGWKHWVYVYTCPPDPT--PYLDITYHFIMQRIPLYFVVNVIIPCLL 224  
 alpha1\_Human LSNFMESGEWVIKESRGWKHSVYTYSCCPDPT--PYLDITYHFVMQRLPLYFIVNVIIPCLL 224  
 alpha3\_Human LKDYWESGEWAIKAPGYKHDIKYNCCEE---IYPDITYAFVIRRLPLFYINLIIPCLL 223  
 alpha4\_Human QLDFWESGEWIVDAVGTYNTRKYECCEAE---IYPDITYAFVIRRLPLFYINLIIPCLL 223  
 alpha7\_Human ISGYIPNGEWDLVGIPGRKSERFYECCKE---PYPDVTFVTMRRRTLYYGLNLLIPCVL 221  
 alpha9\_Human LSDFIEDVEWEVHGMPAVKNVISYGCCSE---PYPDVTFVTLKRRSSFYIVNLLIPCVL 223  
 beta\_Torpedo KDAFTENGQWSIEHKPSRKNWRSDDP-----SYEDVTFYLI IQRKPLFYIVYTIIPCIL 230  
 beta1\_Human EGTFTIENGQWEI IHKPSRLIQPPGDRGGREGQRQEVIFYLI IRRKPLFYLVNVIAPCIL 235  
 gamma\_Torpedo PEDFTENGWEVIRHRPAKKNYNWQLTKDDT--DFQEIIFFLII IQRKPLFYIINI IAPCVL 232  
 gamma\_Human PEAFTEGWEVIAQHRPAKMLLDPAAPAQEA--GHQKVVFYLLI IQRKPLFYVINI IAPCVL 232  
 epsilon\_Human TEAYTEGWEAIDFCPGVIRRHGGATDGP--GETDVIYSLI IRRKPLFYVINI IVPCLV 233  
 delta\_Torpedo PEAFTEGWEI IHKPAKKNYIPDKFNPNGT--NYQDVTYFYLII IRRKPLFYVINI ITPCVL 238  
 delta\_Human PEGFTENGWEIVHRPARVNVDPRAPLDSP--SRQDITFYLI IRRKPLFYIINI IVPCLV 238



|               |                                                                              |     |
|---------------|------------------------------------------------------------------------------|-----|
|               |                                                                              |     |
| alpha_Torpedo | FSFLTGLVLFYLPDTSG-EKMTLSISVLL <sup>9</sup> LSLTVFLLVIVELIPSTSSAVPLIGKYMLFTMI | 283 |
| alpha1_Human  | FSFLTGLVLFYLPDTSG-EKMTLSISVLLLSLTVFLLVIVELIPSTSSAVPLIGKYMLFTMV               | 283 |
| alpha3_Human  | ISFLTVLVYFLPDCG-EKVTLCSISVLLLSLTVFLLVITETIPSTSLVIPLIGEYLLFTMI                | 282 |
| alpha4_Human  | ISCLTVLVYFLPSECG-EKITLCSISVLLLSLTVFLLLITEIIPSTSLVIPLIGEYLLFTMI               | 282 |
| alpha7_Human  | ISALALLVFLLPADSG-EKISLGITVLLSLTVFMLLVAEIMPATSDSVPLIAQYFASTMI                 | 280 |
| alpha9_Human  | ISFLAPLSFYLPAAASG-EKVS LGVTILLAMTVFQLMVAEIMPAS-ENVPLIGKYIATMA                | 281 |
| beta_Torpedo  | ISILAILVYFLPPDAG-EKM SLSISALLAVTVFLLLLADKVPETSLSVPIIRYLMFIMI                 | 289 |
| beta1_Human   | ITLLAIFVYFLPPDAG-EKMGLSIFALLTLTVFLLLLADKVPETSLSVPIIKYLMFTMV                  | 294 |
| gamma_Torpedo | ISSLVVLVYFLPAQAGGQKCTLSISVLLAQTIFLFLIAQKVPETSLNVPLIGKYLI FVMF                | 292 |
| gamma_Human   | ISSVAIIHFLPAKAGGQKCTVAINVLLAQTIVFLFLVAKKVPETSQAVPLISKYLTFLLV                 | 292 |
| epsilon_Human | ISGLVLLAYFLPAQAGGQKCTVSINVLLAQTIVFLFLIAQKIPETSLSVPLLRFLIFVMV                 | 293 |
| delta_Torpedo | ISFLASLAFYLPAAESG-EKMSTAISVLLAQA VFLLLTSQRLPETALAVPLIGKYLMFIMS               | 297 |
| delta_Human   | ISFMVNLVYFLPADSG-EKTSVAISVLLAQS VFLLLISKRLPATSM A I PLIGKFLFLGMV             | 297 |

|               |                                                                  |     |
|---------------|------------------------------------------------------------------|-----|
|               |                                                                  |     |
| alpha_Torpedo | FVISSIIITVVVINTHHRSPSTHTMPQWVRKIFIDTIPNVFFFSTMKRASKEKQE----N     | 339 |
| alpha1_Human  | FVIASIIITVIVINTHHRSPSTHVMFNWVRKVFIDTIPNIMFFFSTMKRPSREKQD----K    | 339 |
| alpha3_Human  | FVTLTSIVITVFLNVHYRTPTHTMP SWVKTVFLNLLPRVMFMTR---PTSNEGN----A     | 335 |
| alpha4_Human  | FVTLTSIVITVFLNVHHRSPRTHMPTWVRRVFLDIVPRLLLMKR---PSVVKDN----C      | 335 |
| alpha7_Human  | IVGLSVVTVIVLQYHHHDPDGGKMPKWTRVILLNWCAWFLR---MKRPGEDKVRPA--C      | 335 |
| alpha9_Human  | LITASTALTIMVMNIHF CGAEARVPVPHWARVVILKYMSRVLFVYDVGESCLSPH----H    | 336 |
| beta_Torpedo  | LVAFSVILSVVVLNLHHRSPNTHMPNWRQIF IETLPPFLWIQR---PVTT PSP----      | 341 |
| beta1_Human   | LVTFSVILSVVVLNLHHRSPHTHQ MPLWVRQIF I HKLPLYLR LKR---PKPERDLMP--E | 349 |
| gamma_Torpedo | VSMLIVMNCVIVLNVSLRTPNTHSLSEKIKHLFLGFLPKYLG MQL---EPSEETPEK---    | 346 |
| gamma_Human   | VTILIVVNAVVVLNVSLRSPHTHSMARGVRKVFRLRLPQLLRMHV---RPLAAPAVQDTQ     | 349 |
| epsilon_Human | VATLIVMNCVIVLNVSQRTPTTHAMSPRLRHVLELLPRLLGSP---PPEA-PRAA---       | 346 |
| delta_Torpedo | LVTGVIVNCGIVLNFHFRTPSTHVLSTRVKQIFLEKLPRI LHMSR---ADESEQPDWQND    | 354 |
| delta_Human   | LVTMVVVICVIVLNIHFRTPSTHVLSEGVK KFLFLETLP ELLHMSR---PAEDGPS---PG  | 351 |

|               |                                                              |     |
|---------------|--------------------------------------------------------------|-----|
| alpha_Torpedo | K-----IFADDIDI-----                                          | 348 |
| alpha1_Human  | K-----IFTEDIDI-----                                          | 348 |
| alpha3_Human  | QKPR-----PLYGAEL-----SNLNCFSR---                             | 354 |
| alpha4_Human  | RRLIESMHKMASAPRFWPEPEGEPPATSGTQSLHPPSPSFCVPLDVPAEPGSPCKSPSDQ | 395 |
| alpha7_Human  | QHKQRR---CSLASVEMSAVAPPASNGNL-----LY-----                    | 364 |
| alpha9_Human  | SRERDHLTKVYSK-----LPE-----S-----                             | 353 |
| beta_Torpedo  | ----DS-----KPT-----IISRANDEYFIRKPAGDF                        | 364 |
| beta1_Human   | PPHCSS-----PGS-----GWGRGTDEYFIRKPPSDF                        | 376 |
| gamma_Torpedo | PQPRRR-----SSF-----GIMIKAE EYILKKP RSEL                      | 373 |
| gamma_Human   | SRLQNG-----SSG-----WSITTGEEVALCLPRSEL                        | 376 |
| epsilon_Human | SPPRRA-----SSV-----GLLLRAEELI LKKP RSEL                      | 373 |
| delta_Torpedo | LKLRRS-----SSV-----GYISKAQEYFN I KSRSEL                      | 381 |
| delta_Human   | ALVRRS-----SSL-----GYISKAEEYFLKRSRSDL                        | 378 |

|               |                                                              |     |
|---------------|--------------------------------------------------------------|-----|
| alpha_Torpedo | -----                                                        | 348 |
| alpha1_Human  | -----                                                        | 348 |
| alpha3_Human  | -----AESKGCKEGYPCQDGM                                        | 370 |
| alpha4_Human  | LPPQQPLEAEKASPHSPGPCRPPHGTQAPGLAKARSLSVQHMS SPGEAVEGGVRCRSRS | 455 |
| alpha7_Human  | -----IGFRGLDGVHC-----                                        | 375 |
| alpha9_Human  | -----NLKAARNKDL SRKKDMNKRLKNDLGCQ GK-                        | 382 |
| beta_Torpedo  | VCPVDNAR-----V-----AVQPERLF-----                             | 381 |
| beta1_Human   | LFPKPNR-----FQPELSA-----                                     | 390 |
| gamma_Torpedo | MFEEQKDR-----H-----GLKR--VN-----                             | 388 |
| gamma_Human   | LFQQWQ-R-----Q-----GLVAAALE-----                             | 392 |
| epsilon_Human | VFEGQRHR-----Q-----GTWT-----                                 | 386 |
| delta_Torpedo | MF EKQSER-----H-----GLVPRVTP-----                            | 398 |
| delta_Human   | MF EKQSER-----H-----GLARRLT-----                             | 395 |

|               |                                                             |     |
|---------------|-------------------------------------------------------------|-----|
| alpha_Torpedo | -----SDISGKQV-----TG-----                                   | 358 |
| alpha1_Human  | -----SDISGKPG-----PP-----                                   | 358 |
| alpha3_Human  | CGYCHHRIKISNFSAN-----LTR-----SSSS                           | 394 |
| alpha4_Human  | IQYCVPRDDAAPEADGQAAGALASRNTHSAELPPDPQSPCKCTCKKEPSSVSPSATVKT | 515 |
| alpha7_Human  | ----VPTP-----DSGVVCGRMACSPHDEHLLH-----                      | 400 |
| alpha9_Human  | -----S-----EMK                                              | 382 |
| beta_Torpedo  | -----S-----EMK                                              | 385 |
| beta1_Human   | -----P-----DLR                                              | 394 |
| gamma_Torpedo | -----KMTSDI-----DIG                                         | 397 |
| gamma_Human   | -----KLEKGP-----ELG                                         | 401 |
| epsilon_Human | -----R-----I-----GFG                                        | 386 |
| delta_Torpedo | -----R-----I-----GFG                                        | 403 |
| delta_Human   | -----A-----R-----RPP                                        | 400 |

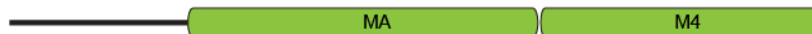

|               |                                                                |     |
|---------------|----------------------------------------------------------------|-----|
| alpha_Torpedo | --EVIFQTPLIKNPDVKSIAIEGVKZIAEHMKSDEESSNAAAEWKYVAMVIDHILLCVFML  | 416 |
| alpha1_Human  | --PMGFHSPLIKHFEVKSAIEGKZIAETMKSQESNAAAQWKYVAMVMDHILLGVFML      | 416 |
| alpha3_Human  | ESVDAVLSLSALSPEIKEAIQSVKZIAENMKAQNEAKEIQDDWKYVAMVIDRIFLWVFTL   | 454 |
| alpha4_Human  | RSTKAPPHLPLSPALTRAVEGVQYIADHLKAEDTDFSVKEDWKYVAMVIDRIFLWVFII    | 575 |
| alpha7_Human  | ----GGQPPEGDPDLAKILEEVRYIANRFRQCDESEAVCSEWKFAACVVDRLCLMAFSV    | 455 |
| alpha9_Human  | ----NPQEAESYCAQYKVLTRNIEYIAKCLDKHKATNSKGEWKVAKVIDRFFMWFIFI     | 438 |
| beta_Torpedo  | WHLNGLTQPVTLPQDLKEAVEAIAEKYIAEQLESASEFDDLKDWQYVAMVADRLFLYVFFV  | 445 |
| beta1_Human   | RFIDGPNRAVALLPELREVVSSISYIARQLQEQEDHDALKEDWQFVAMVVDRLFLWTFII   | 454 |
| gamma_Torpedo | TTVDLYKDLANFAPEIKSCVEACNFIKSTKEQNDSGSEENWVLIKVIDKACFWIALL      | 457 |
| gamma_Human   | -LSQFCGSLKQAAPAIQACVEACNLIACARHQQSHFDNGNEEWFVGRVLDRCVFLMLS     | 460 |
| epsilon_Human | --AAFQQLGAAAEVRCVDAVNFAESTRDQEQATGEEVSDWVRMGNALDNICFWAALV      | 444 |
| delta_Torpedo | NNNENIAASDQLHDEIKSGIDSTNYIVKQIKEKNAYDEEVGNWNLVGGQTIIDRLSMFIITP | 463 |
| delta_Human   | A--SSEQAQQELFNELKPAVDGANFIVNHMRDQNNYNEEKDSWNRVARTVDRLCLFVVTP   | 458 |

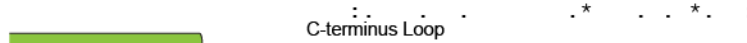

|               |                                       |     |      |      |
|---------------|---------------------------------------|-----|------|------|
| alpha_Torpedo | ICIIGTVSVFAGR-----LIELSQEG-----       | 437 | 100% |      |
| alpha1_Human  | VCIIGTLAVFAGR-----LIELNQQG-----       | 437 | 80%  |      |
| alpha3_Human  | VCILGTAGLFLQP-----LMAREDA-----        | 474 | 51%  |      |
| alpha4_Human  | VCLLGTVGLFLFP-----WLAGMI-----         | 594 | 51%  |      |
| alpha7_Human  | FTIICTIGILMSAPN-----FVEAVSKDFA-----   | 480 | 38%  |      |
| alpha9_Human  | MVFVMTILIIARAD-----                   | 452 | 36%  |      |
| beta_Torpedo  | ICSIGTFSIFLDASHNVPPDNPFA-----         | 469 | 44%  | 100% |
| beta1_Human   | FTSVGTLVIFLDATYHLPDPPF-----           | 478 | 38%  | 59%  |
| gamma_Torpedo | LFSIGTLAIFLTGHFNQVPEFPFGDPRKYVP-----  | 489 | 35%  | 100% |
| gamma_Human   | LFICGTAGIFLMAHYNRVPALPFPDPRPYLPSPD--- | 495 | 33%  | 55%  |
| epsilon_Human | LFSVGSSLIFLGAYFNRPDLPYAPCIQP-----     | 473 | 31%  | 56%  |
| delta_Torpedo | VMVLGTIFIFVMGNFNHPAKPFEQDPFDYSSDHPRCA | 501 | 36%  | 100% |
| delta_Human   | VMVVGTAWIFLQGVYVQPPFPFGDPPYSYVQDKRFI  | 496 | 37%  | 60%  |

**Figure S12. Sequence alignment of *Torpedo* and human muscle nicotinic receptor subunits with human  $\alpha$  subunits**

*Related to Figure 1*

Sequence identity percent is listed at the end. The first column is compared to the  $\alpha$  subunit from *Torpedo*.

The second column is % sequence identity compared to the corresponding subunit from *Torpedo*.

**A**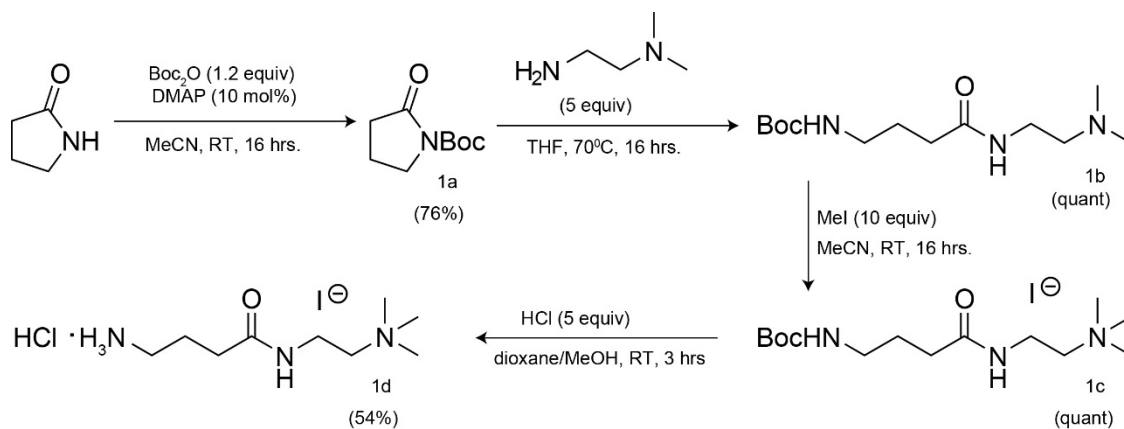**B**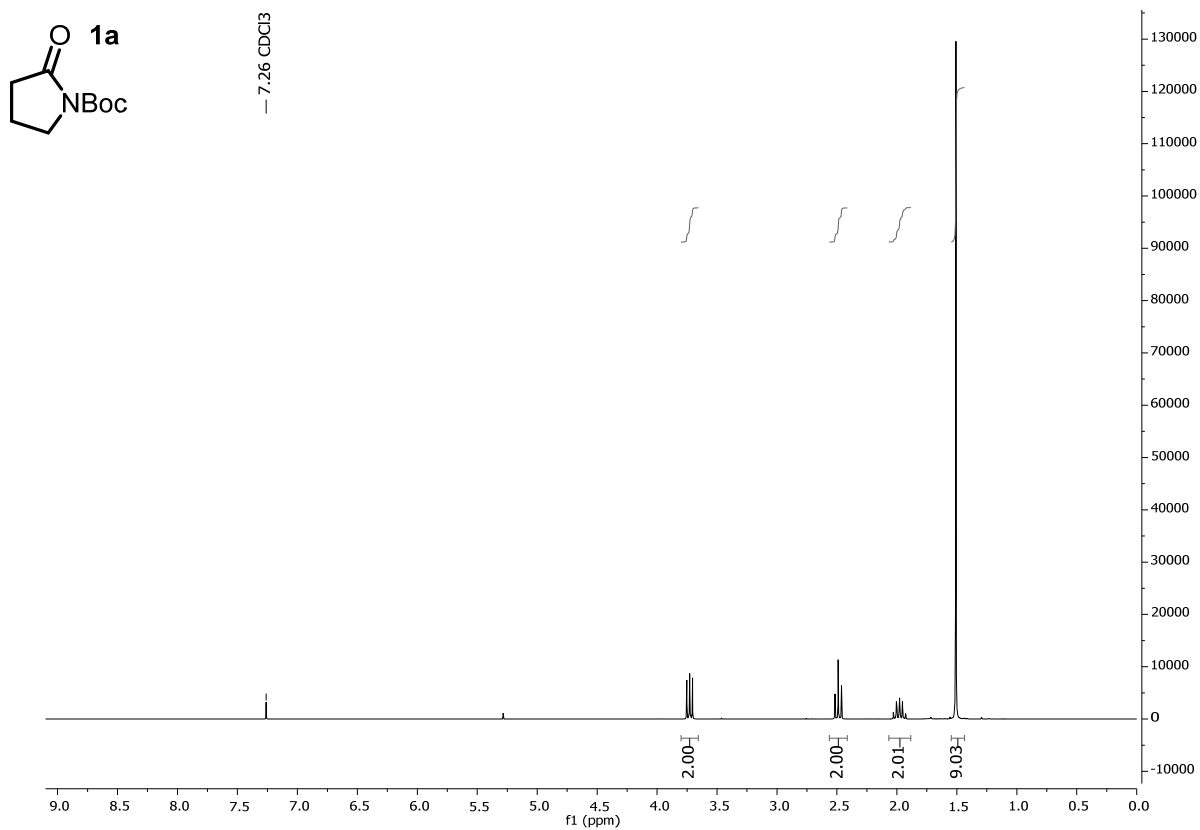

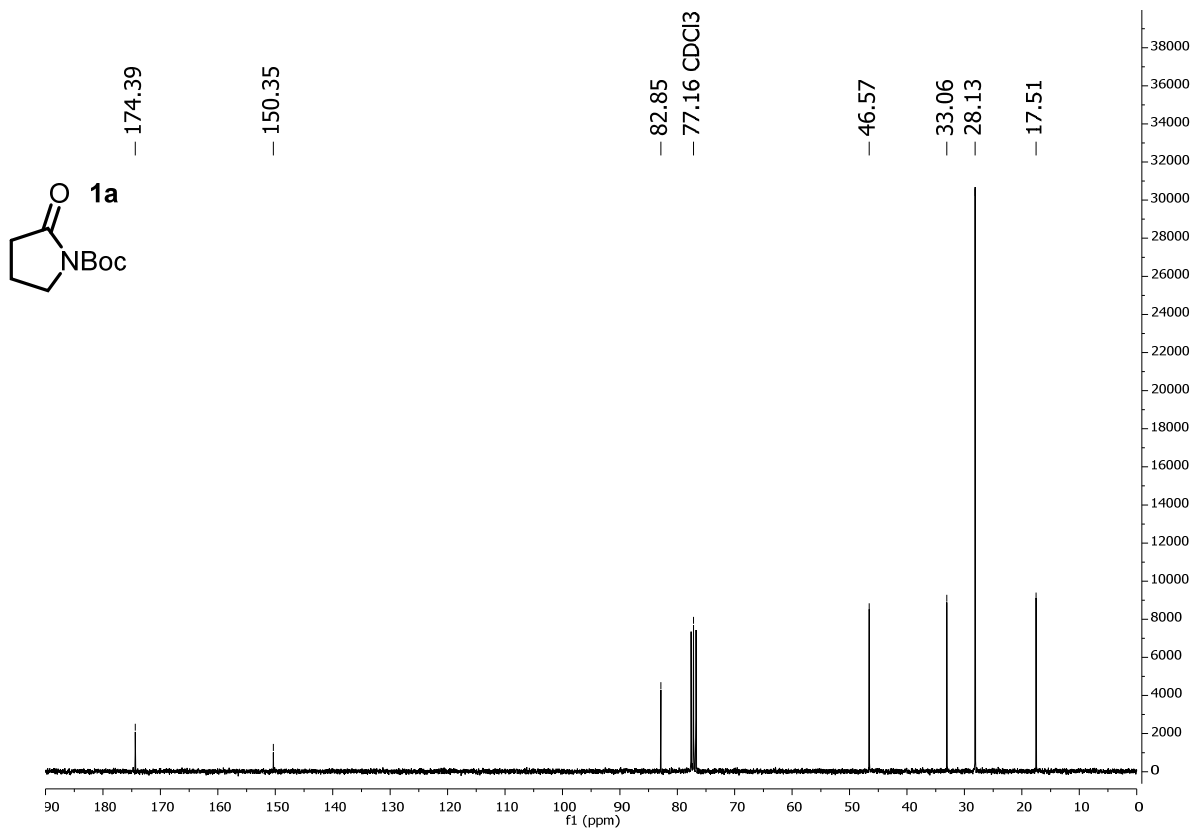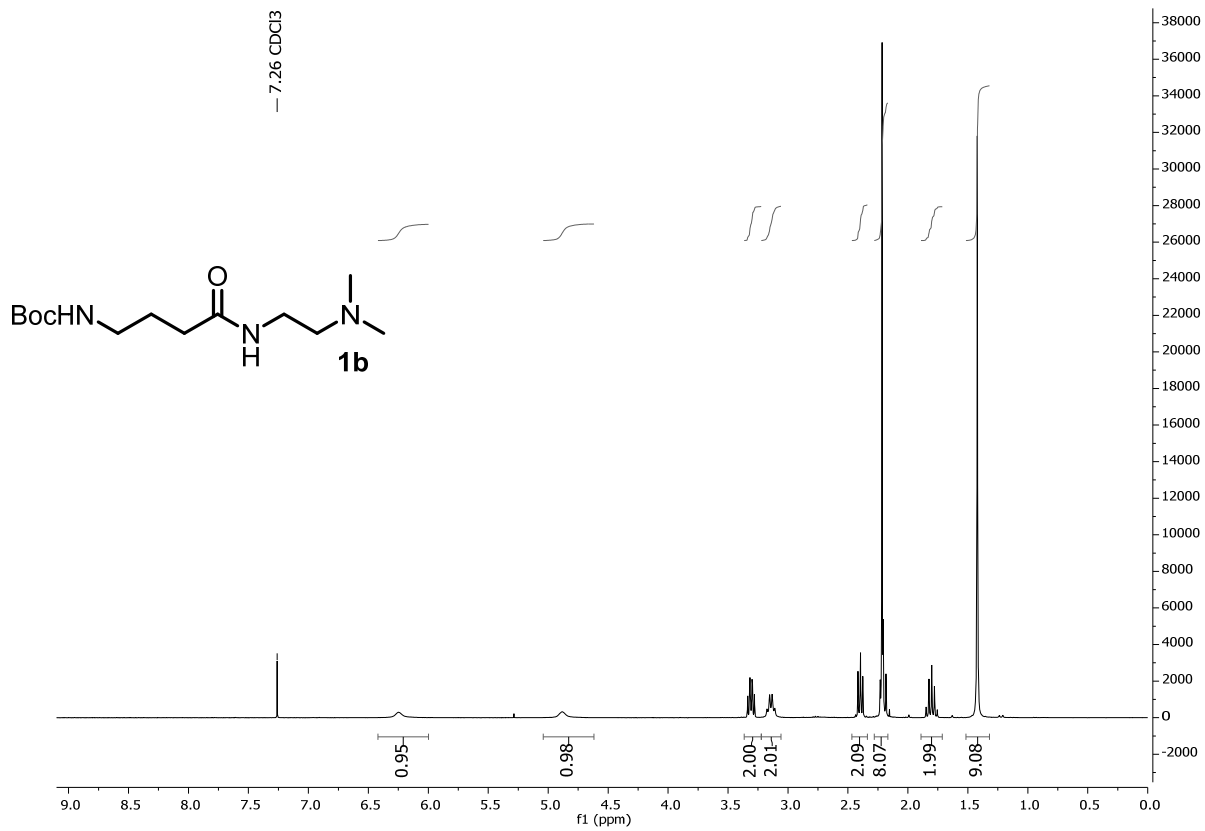



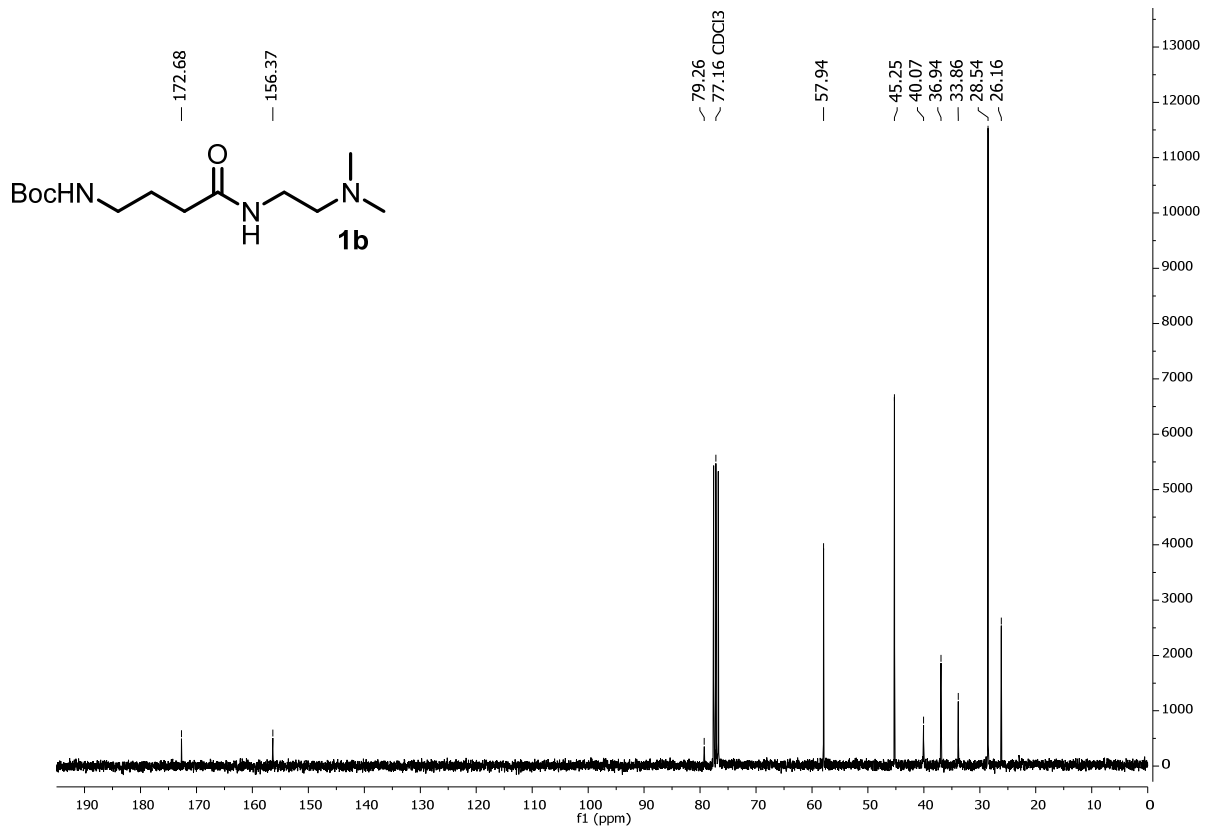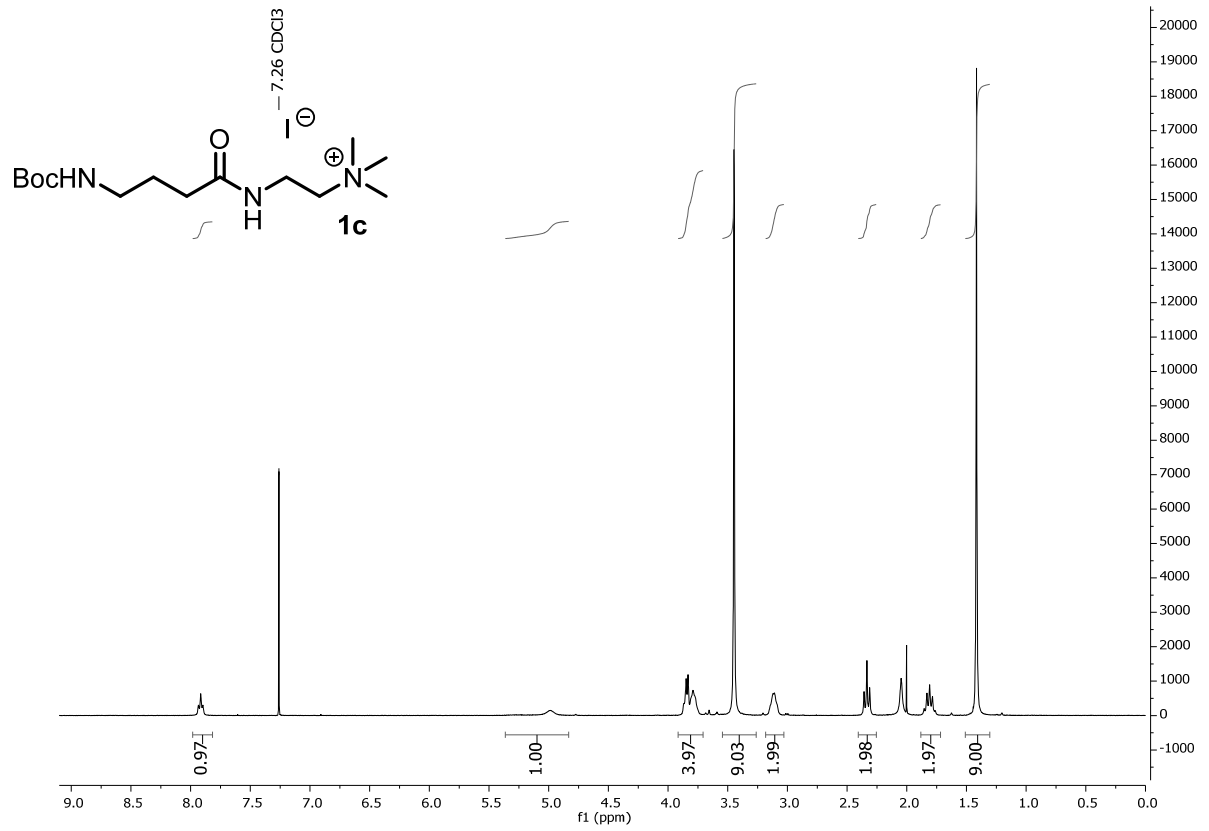

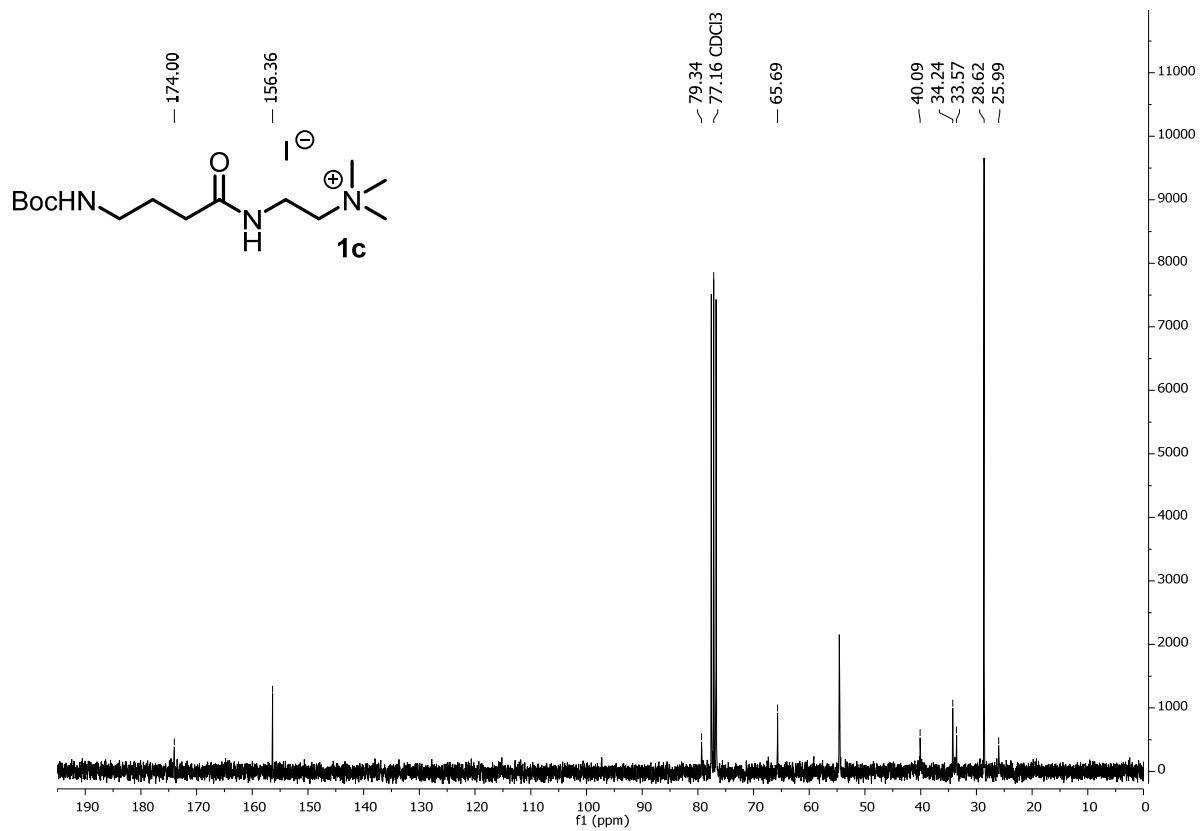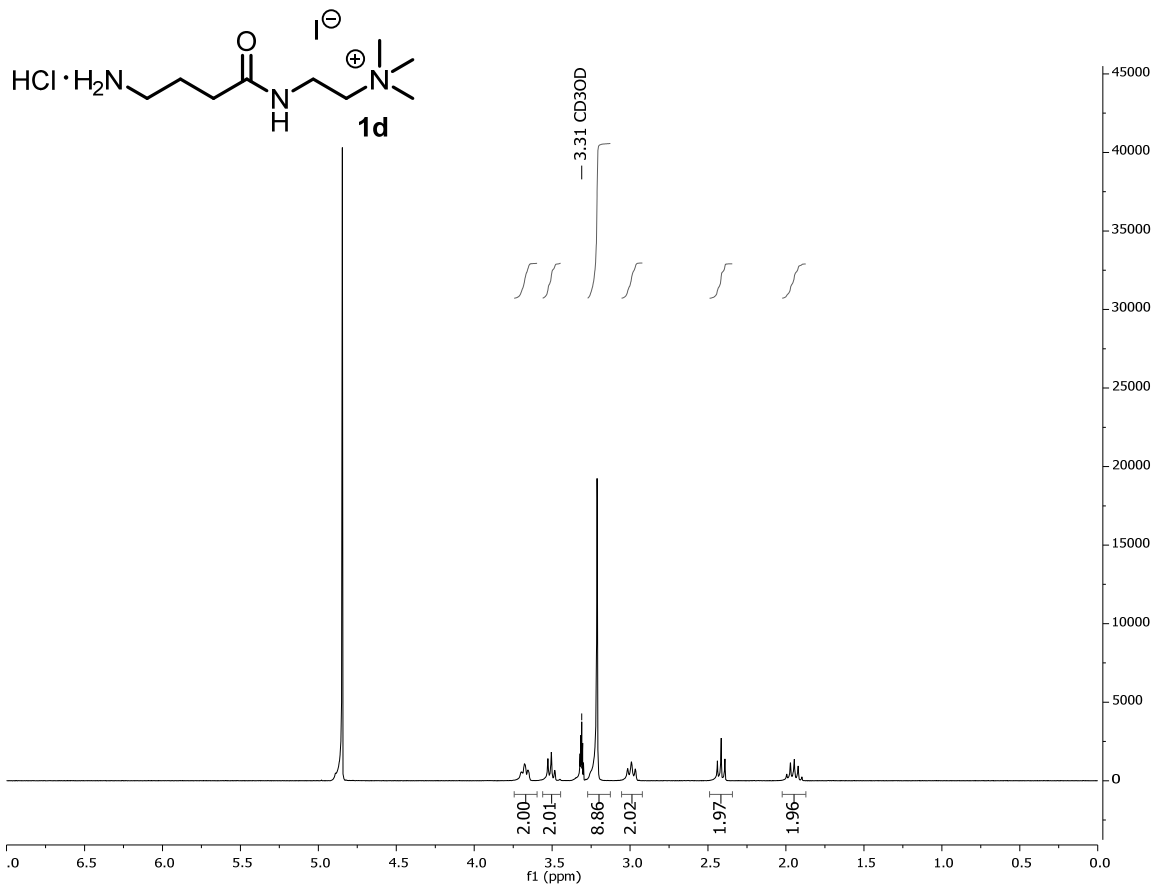

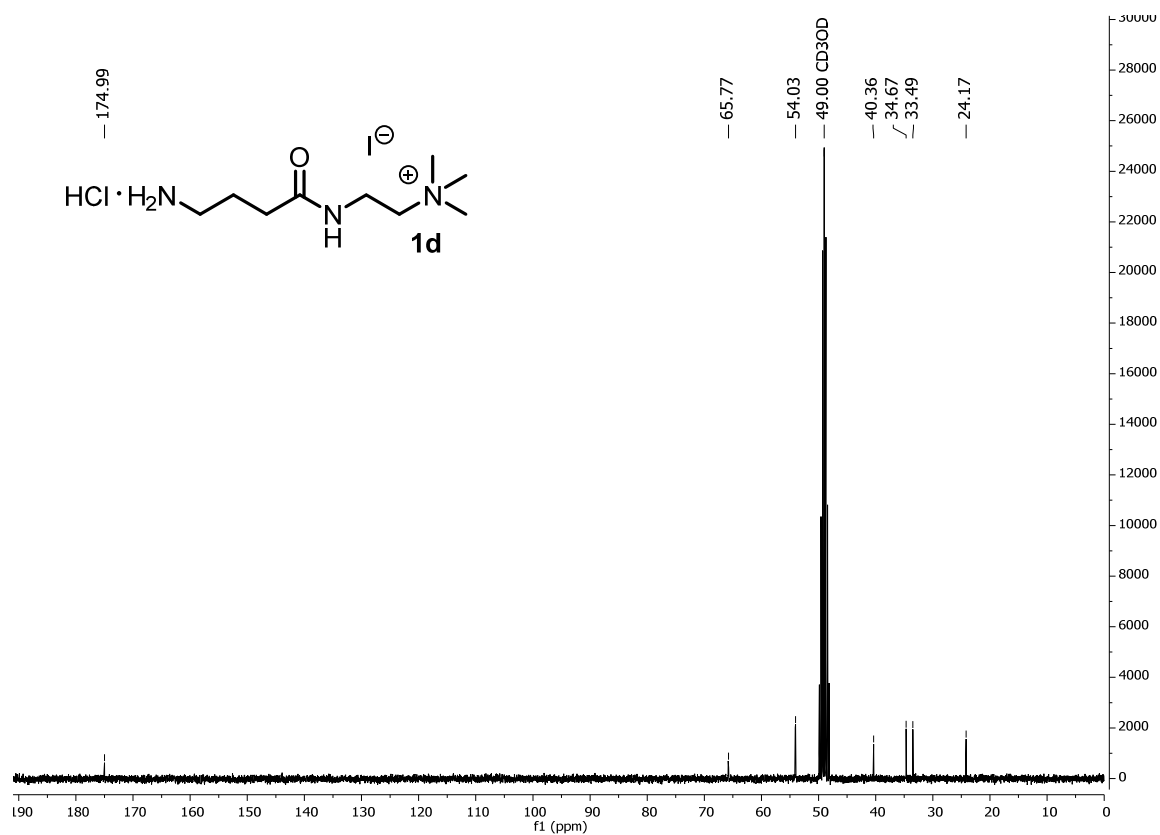

**Figure SI 3: (A) Overview of ATM (2-[(4-aminobutanoyl)amino]-*N,N,N*-trimethylethanaminium) affinity reagent synthesis and their representative NMR Spectra.**

*Related to STAR Methods*

**Table S11. Data collection and refinement statistics***Related to Figure 1 and STAR Methods*

|                                              |                                    |
|----------------------------------------------|------------------------------------|
| <b>Data collection</b>                       |                                    |
| Microscope                                   | FEI Titan Krios, OHSU              |
| Magnification                                | 130KX                              |
| Voltage (keV)                                | 300                                |
| Exposure time (s)                            | 1                                  |
| Number of frames                             | 50                                 |
| Electron exposure (e/Å <sup>2</sup> )        | 35                                 |
| Detector                                     | Gatan K3                           |
| Pixel size (Å/pixel)                         | 0.648                              |
| Micrographs                                  | 7426                               |
| <b>Reconstruction</b>                        |                                    |
| Initial number of particles                  | 1,126,590                          |
| Final number of particles for reconstruction | 127,482                            |
| Symmetry imposed                             | C1                                 |
| Box size (pixels)                            | 384                                |
| Map Resolution (Å)                           | 2.69                               |
| FSC threshold                                | 0.143                              |
| Map-sharpening B-factor (Å <sup>2</sup> )    | -60                                |
| <b>Refinement</b>                            |                                    |
| Number of non-H atoms                        | 18,330                             |
| Protein residues                             | 2178                               |
| N-glycan                                     | 34                                 |
| Water                                        | 138                                |
| Lipid                                        | 6                                  |
| Molprobrity score                            | 1.83 (99 <sup>th</sup> percentile) |
| Clashscore                                   | 8.22 (98 <sup>th</sup> percentile) |
| Poor rotamers (%)                            | 0                                  |
| R.M.S.D. values                              |                                    |
| Bond lengths (Å)                             | 0.011                              |
| Bond angles (°)                              | 0.701                              |
| Ramachandran analysis                        |                                    |
| Favored (%)                                  | 94.42                              |
| Outliers (%)                                 | 0                                  |



**Table S12. Mutations linked to congenital myasthenic syndromes (CMS)***Related to Figure 5*Red highlights indicate residues that are not conserved between human muscle and *Torpedo*.From: Engel, A. G., Shen, X. M., Selcen, D. & Sine, S. M. Congenital myasthenic syndromes: pathogenesis, diagnosis, and treatment. *Lancet Neurol* 14, 420-434, doi:10.1016/S1474-4422(14)70201-7 (2015)**Slow channel CMS mutants**

| Residue               | Our structure residue/number |
|-----------------------|------------------------------|
| Ligand binding domain |                              |
| $\alpha$ -V156M       | $\alpha$ -same               |
| $\alpha$ -G153S       | $\alpha$ -same               |
| Coupling domain       |                              |
| $\alpha$ -S269I       | $\alpha$ -same               |
| Pore domain           |                              |
| $\alpha$ -N217K       | $\alpha$ -same (M1)          |
| $\alpha$ -V249F       | $\alpha$ -same (M2/7')       |
| $\alpha$ -T254I       | $\alpha$ -same (M2/12')      |
| $\alpha$ -C418W       | $\alpha$ -same (M4)          |
| $\beta$ -V229F        | $\beta$ -T224                |
| $\beta$ -L262M        | $\beta$ -L257 (M2/9')        |
| $\beta$ -T265S        | $\beta$ -T260 (M2/12')       |
| $\beta$ -V266M        | $\beta$ -V261 (M2/13')       |
| $\delta$ -S268Y       | $\delta$ -A268               |
| $\delta$ -S268F       |                              |
| $\epsilon$ -L221F     | $\gamma$ -L220 (M1)          |
| $\epsilon$ -V259L     | $\gamma$ -V258 (M2/7')       |
| $\epsilon$ -T264P     | $\gamma$ -T263 (M2/12')      |
| $\epsilon$ -V265A     | $\gamma$ -I264               |
| $\epsilon$ -L269F     | $\gamma$ -L268 (M2/17')      |

**Fast channel CMS mutants**

| Residue               | Our structure residue/number |
|-----------------------|------------------------------|
| Ligand binding domain |                              |
| $\epsilon$ -T38K      | $\gamma$ -same               |
| $\delta$ -L42P        | $\delta$ -same               |
| $\epsilon$ -W55R      | $\gamma$ -same               |
| $\delta$ -E59K        | $\delta$ -D59                |
| $\alpha$ -V188M       | $\alpha$ -same               |
| $\epsilon$ -P121L     | $\gamma$ -same               |
| $\epsilon$ -D175N     | $\gamma$ -D174               |
| $\epsilon$ -N182Y     | $\gamma$ -N181               |
| $\epsilon$ -E184K     | $\gamma$ -E183               |
| Coupling domain       |                              |
| $\alpha$ -V132L       | same                         |
| Pore domain           |                              |
| $\delta$ -P250Q       | $\delta$ -same (M1)          |
| $\alpha$ -F256L       | $\alpha$ -same (M2/14')      |
| $\alpha$ -V285I       | $\alpha$ -same (M3)          |

**SI video legends:**

**Video S11:** Superposition of  $\alpha$  subunits from  $\alpha$ -bungarotoxin complex structure (green, this study) and apo receptor structure (orange, PDB ID: 2BG9). *Related to Figure 1*

**Video S12:** Superposition of  $\beta$  subunits from  $\alpha$ -bungarotoxin complex structure (this study) and apo receptor structure (PDB ID: 2BG9). Colors as in Video S1. *Related to Figure 1*

**Video S13:** Superposition of  $\gamma$  subunits from  $\alpha$ -bungarotoxin complex structure (this study) and apo receptor structure (PDB ID: 2BG9). Colors as in Video S1. *Related to Figure 1*

**Video S14:** Superposition of  $\delta$  subunits from  $\alpha$ -bungarotoxin complex structure (this study) and apo receptor structure (PDB ID: 2BG9). Colors as in Video S1. *Related to Figure 1*

**Video S15:**  $\alpha$ -Bungarotoxin (chain F) with model shown as sticks and density map contoured at a threshold of 0.006 in UCSF Chimera. *Related to Figure 1*
